# Supplementary material
Source: PubMed Central journal article supplement (PMC11028669)

**Supplementary Figure. Effects of TNF- $\alpha$  on tumor size.** B16 tumors were grown in WT and TNFR<sup>-/-</sup> mice and measured when the mice were euthanized. Tumor area was calculated as length x width in mm.

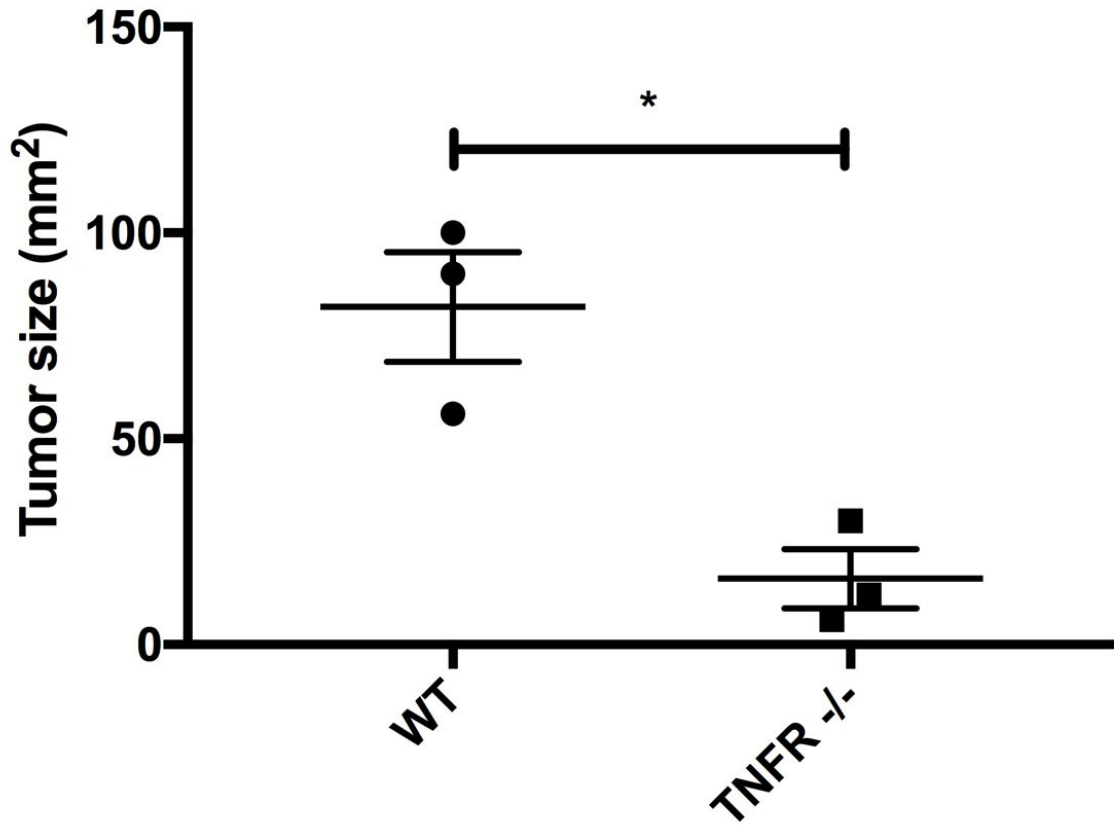

Supplement: 262_2017_1955_MOESM1_ESM.pdf [file 262_2017_1955_MOESM1_ESM.pdf]
